# Supplementary material for: Phase segregation in hydroxyfluorapatite solid solution at high temperatures studied by combined XRD/solid state NMR
Source: Royal Society of Chemistry journal article supplement (doi:10.1039/c6ra17161c), 2016-01-01
Supplement: c6ra17161c1.pdf [file c6ra17161c1.pdf]

Table s1 *a* axis fitting results

| $y = \text{Intercept} + \text{Slope} * x$ |              |              |              |
|-------------------------------------------|--------------|--------------|--------------|
| <b>Parameter</b>                          | <b>300°C</b> | <b>750°C</b> | <b>900°C</b> |
| Intercept                                 | 9.44         | 9.42         | 9.38         |
| slope                                     | -5.92E-4     | -5.14E-4     | 4.83E-6      |
| R <sup>2</sup>                            | 0.9792       | 0.9469       | 0.0823       |
